# Supplementary material
Source: PubMed Central journal article supplement (PMC6233747)
Supplement: jamainternmed-178-1333-s002.pdf [file jamainternmed-178-1333-s002.pdf]

## Supplementary Online Content

Diokno AC, Newman DK, Low LK et al. Effect of group-administered behavioral treatment on urinary incontinence in older women: a randomized clinical trial. *JAMA Intern Med*. Published online September 4, 2018.  
doi:10.1001/jamainternmed.2018.3766

**eTable 1.** Cost-Effectiveness Outcomes

**eTable 2.** Incidence of Adverse Events and Serious Adverse Events

This supplementary material has been provided by the authors to give readers additional information about their work.

**eTable 1. Cost-Effectiveness Outcomes**

| <i>Outcome</i>   | <i>Group</i> | <i>Total Costs</i>             | <i>Successful Outcome*</i> | <i>Cost per Success</i>     | <i>Incremental Cost</i> | <i>Incremental Success</i> | <i>Incremental Cost Effectiveness Ratio</i> |
|------------------|--------------|--------------------------------|----------------------------|-----------------------------|-------------------------|----------------------------|---------------------------------------------|
| <i>3 Months</i>  |              |                                |                            |                             |                         |                            |                                             |
| UI episodes      | Control      | \$16,773 (\$12,356 - \$22,552) | 39 (28 - 52)               | \$430 (\$280 - \$650)       |                         |                            |                                             |
|                  | GBT          | \$33,323 (\$28,801 - \$38,713) | 65 (50 - 82)               | \$513 (\$410 - \$661)       | \$16,550                | 26                         | \$637                                       |
| ICIQ-SF Score    | Control      | \$16,901 (\$12,564 - \$22,492) | 34 (24 - 46)               | \$497 (\$331 - \$755)       |                         |                            |                                             |
|                  | GBT          | \$33,539 (\$28,860 - \$39,529) | 57 (43 - 73)               | \$588 (\$461 - \$758)       | \$16,638                | 23                         | \$723                                       |
| <i>6 Months</i>  |              |                                |                            |                             |                         |                            |                                             |
| UI episodes      | Control      | \$28,968 (\$21,671 - \$39,719) | 30 (20 - 42)               | \$966 (\$640 - \$1,540)     |                         |                            |                                             |
|                  | GBT          | \$38,171 (\$31,746 - \$44,981) | 71 (55 - 90)               | \$538 (\$429 - \$686)       | \$9,203                 | 41                         | \$224                                       |
| ICIQ-SF Score    | Control      | \$29,055 (\$21,098 - \$39,819) | 30 (20 - 41)               | \$969 (\$648 - \$1,507)     |                         |                            |                                             |
|                  | GBT          | \$38,702 (\$32,573 - \$45,791) | 66 (52 - 84)               | \$586 (\$466 - \$750)       | \$9,647                 | 36                         | \$268                                       |
| <i>12 Months</i> |              |                                |                            |                             |                         |                            |                                             |
| UI episodes      | Control      | \$54,501 (\$39,347 - \$74,897) | 42 (31 - 55)               | \$1,298 (\$873 - \$2,052)   |                         |                            |                                             |
|                  | GBT          | \$53,775 (\$42,147 - \$67,054) | 84 (66 - 103)              | \$640 (\$492 - \$842)       | -\$726                  | 42                         | -\$17                                       |
| ICIQ-SF Score    | Control      | \$54,810 (\$39,760 - \$73,951) | 32 (22 - 43)               | \$1,713 (\$1,139 - \$2,633) |                         |                            |                                             |
|                  | GBT          | \$54,018 (\$41,916 - \$66,783) | 69 (55 - 85)               | \$783 (\$613 - \$1,046)     | -\$792                  | 37                         | -\$21                                       |

Data presented as total and 95% confidence interval

\* Outcomes success defined as 3-point reduction in the ICIQ-SF score or 70% reduction in UI episodes recorded on a 3-day diary

**eTable 2.** Incidence of Adverse Events and Serious Adverse Events

| <b>AEs</b>     | <b>Total all Sites<br/>N=463</b> | <b>GBT Group<br/>N=232</b> | <b>Control Group<br/>N=231</b> | <b>P-values</b> |
|----------------|----------------------------------|----------------------------|--------------------------------|-----------------|
| Total AEs      | 295 in 171 pts                   | 145 in 89 pts              | 150 in 82 pts                  | 0.52            |
| # AEs          |                                  |                            |                                | 0.05            |
| 0              | 292 (63.1%)                      | 143 (61.6%)                | 149 (64.5%)                    |                 |
| 1              | 102 (22.0%)                      | 52 (22.4%)                 | 50 (21.7%)                     |                 |
| 2              | 41 (8.9%)                        | 25 (10.8%)                 | 16 (6.9%)                      |                 |
| 3              | 15 (3.2%)                        | 5 (2.2%)                   | 10 (4.3%)                      |                 |
| 4              | 8 (1.7%)                         | 7 (3.0%)                   | 1 (0.4%)                       |                 |
| 5              | 2 (0.4%)                         | 0                          | 2 (0.9%)                       |                 |
| 6              | 2 (0.4%)                         | 0                          | 2 (0.9%)                       |                 |
| 7-11           | 0                                | 0                          | 0                              |                 |
| 12             | 1 (0.2%)                         | 0                          | 1 (0.4%)                       |                 |
| AE Severity    | N=295                            | N=145                      | N=150                          |                 |
| 1: Mild        | 161                              | 68                         | 93                             |                 |
| 2: Moderate    | 121                              | 67                         | 54                             |                 |
| 3: Severe      | 13                               | 10                         | 3                              |                 |
| Total SAEs     | 34 in 27 pts                     | 15 in 12 pts               | 19 in 15 pts                   | 0.54            |
| Number of SAEs |                                  |                            |                                | 0.83            |
| 0              | 436 (94.2%)                      | 220 (94.8%)                | 216 (93.5%)                    |                 |
| 1              | 22 (4.8%)                        | 10 (4.3%)                  | 12 (5.2%)                      |                 |
| 2              | 3 (0.7%)                         | 1 (0.4%)                   | 2 (0.9%)                       |                 |
| 3              | 2 (0.4%)                         | 1 (0.4%)                   | 1 (0.4%)                       |                 |

Frequency of AEs and SAEs were examined with Pearson's Chi-square test.

The number of AEs and SAE were examined with Fisher's Exact tests.

There was no evidence found of any differences in frequency of AEs or SAEs.
